### **Erratum**

In the August 1989 issue, a Clinical Investigation (Ginsberg B, Glass PS, Quill T, Shafron D, Ossey, KD: Onset and duration of neuromuscular blockade following high-dose vecuronium administration. *ANESTHESIOLOGY* 71:201–205, 1989) contains an error. Figures 1 and 2 were transposed. The legends are correct.
